# Supplementary material
Source: Springer Nature journal article supplement (https://www.springermedizin.de/resource/supplementary/12916_2012_580_MOESM2_ESM.pdf/9597926)
Supplement: MOESM2 [file 9597926]

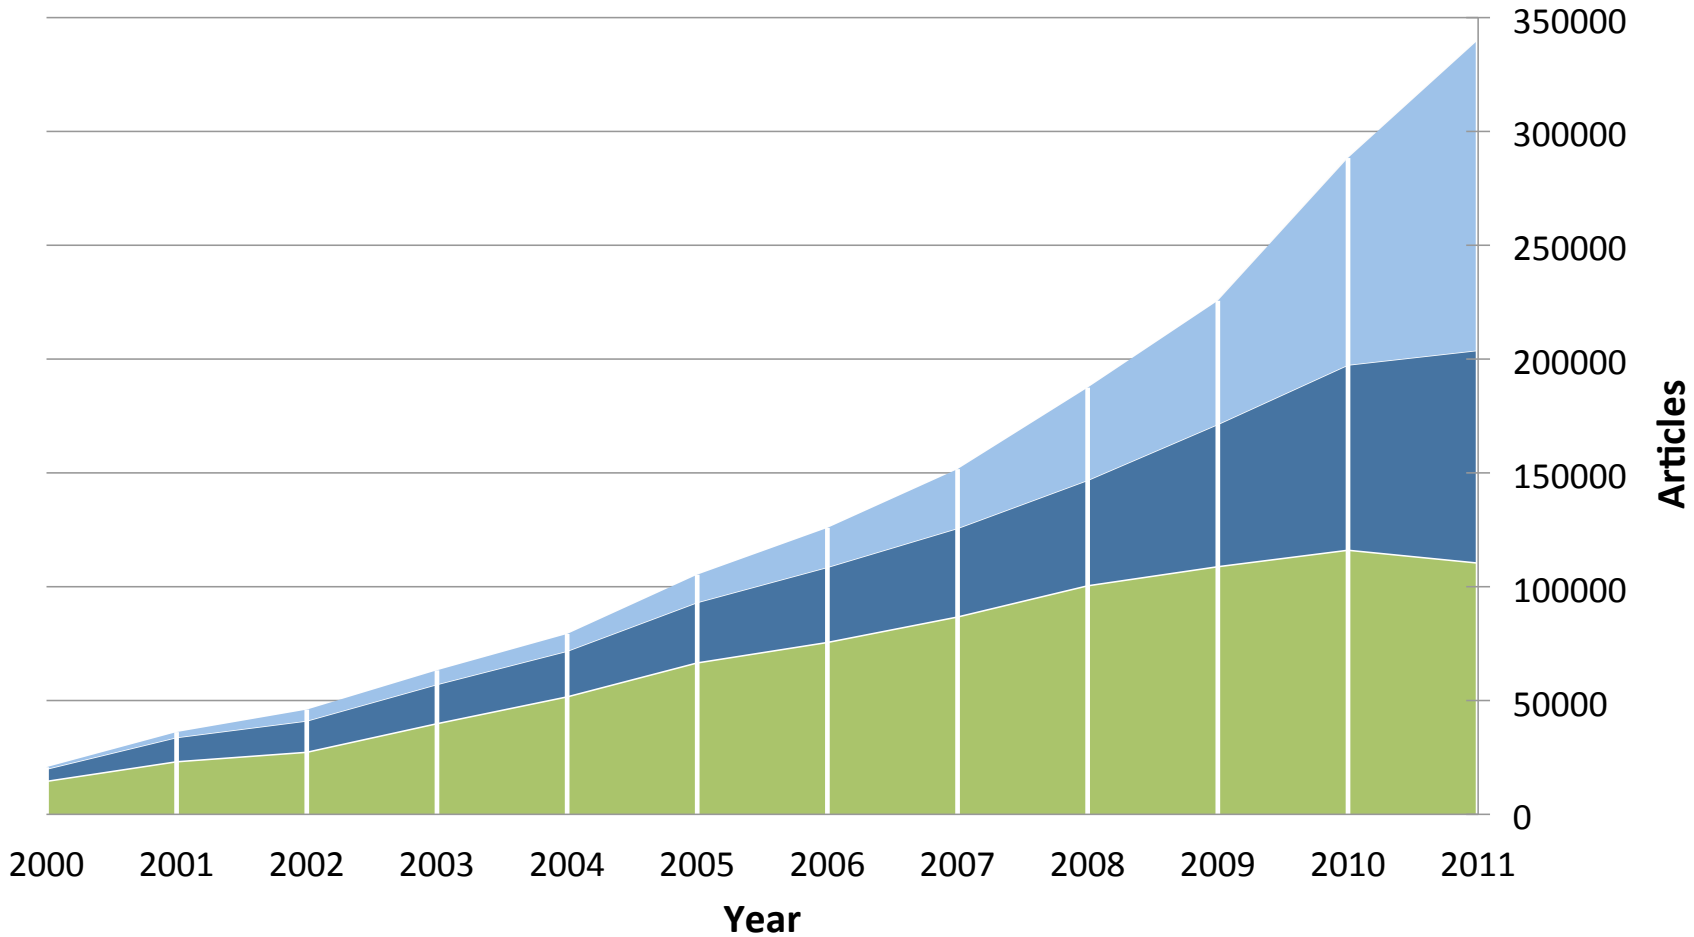

- Published in online-only journals with an article-processing charge
- Published in online-only journals without an article-processing charge
- Published in subscription-based print journals with open access content online
